# Supplementary material
Source: publisher site journal article supplement (https://kjim.org/upload/media/kjim-2025-166-Supplementary-Table-2.pdf)
Supplement: Supplementary file 1 [file kjim-2025-166-Supplementary-Table-2.pdf]

**Supplementary Table 2. Clinical characteristics of the outpatient follow-up patients: with vs. without identified culprit drugs**

| Variable                                  | Culprit identified (n = 51) | Culprit not identified (n = 35) | p value |
|-------------------------------------------|-----------------------------|---------------------------------|---------|
| <b>Reaction type</b>                      |                             |                                 |         |
| Immediate                                 | 42 (82.4)                   | 17 (48.6)                       | 0.002   |
| Anaphylaxis                               | 29 (56.9)                   | 10 (28.6)                       | 0.018   |
| Delayed                                   | 9 (17.6)                    | 18 (51.4)                       | 0.002   |
| Age (yr)                                  | 45.9 ± 15.9                 | 43.1 ± 14.6                     | 0.394   |
| Male, sex                                 | 22 (43.1)                   | 13 (37.1)                       | 0.740   |
| Patients with underlying comorbidities    | 26 (51.0)                   | 15 (42.9)                       | 0.602   |
| Patients with allergic diseases           | 30 (58.8)                   | 21 (60.0)                       | > 0.999 |
| Asthma                                    | 3 (5.9)                     | 2 (5.7)                         | > 0.999 |
| Allergic rhinitis                         | 12 (23.5)                   | 6 (17.1)                        | 0.650   |
| Atopic dermatitis                         | 1 (2.0)                     | 1 (2.9)                         | > 0.999 |
| Food allergy                              | 4 (7.8)                     | 8 (22.9)                        | 0.488   |
| Chronic urticaria                         | 5 (27.8)                    | 1 (2.9)                         | 0.196   |
| Drug allergy                              | 17 (33.3)                   | 7 (20.0)                        | 0.267   |
| Recurrent cases due to known drugs        | 13 (26.5)                   | 4 (11.4)                        | 0.155   |
| <b>Organ specific symptoms</b>            |                             |                                 |         |
| Cutaneous                                 | 45 (88.2)                   | 34 (97.1)                       | 0.233   |
| Respiratory                               | 24 (47.1)                   | 14 (40.0)                       | 0.670   |
| Cardiovascular                            | 15 (29.4)                   | 4 (11.4)                        | 0.087   |
| Neurologic                                | 12 (23.5)                   | 2 (5.7)                         | 0.057   |
| Gastrointestinal                          | 10 (19.6)                   | 3 (8.6)                         | 0.273   |
| Patients with a single suspected drug     | 15 (29.4)                   | 8 (22.9)                        | 0.756   |
| NSAIDs                                    | 6 (40.0)                    | 4 (50.0)                        |         |
| Radiocontrast media                       | 3 (20.0)                    | 0 (0.0)                         |         |
| Beta-lactams                              | 4 (26.7)                    | 3 (37.5)                        |         |
| Other antibiotics                         | 1 (6.7)                     | 1 (12.5)                        |         |
| Gastrointestinal drugs                    | 1 (6.7)                     | 0 (0.0)                         |         |
| Patients with multiple suspected drugs    | 36 (70.6)                   | 27 (77.1)                       | 0.054   |
| NSAIDs + β-lactams                        | 22 (61.1)                   | 8 (29.6)                        |         |
| NSAIDs + Muscle relaxants                 | 7 (19.4)                    | 5 (18.5)                        |         |
| NSAID + Gastrointestinal drug             | 1 (2.8)                     | 3 (11.1)                        |         |
| Gastrointestinal drugs + Muscle relaxants | 0 (0.0)                     | 1 (3.7)                         |         |
| Other combinations                        | 6 (16.7)                    | 10 (37.0)                       |         |
| <b>Work up at clinic</b>                  |                             |                                 |         |
| Drug Provocation tests                    | 34 (66.7)                   | 13 (37.1)                       | 0.013   |
| Test positivity rate (%)                  | 17.6                        | 23.1                            | 0.733   |
| Serum specific IgE measurements to drug   | 26 (51.0)                   | 11 (31.4)                       | 0.115   |
| Test positivity rate (%)                  | 76.9                        | 27.3                            | 0.004   |
| Skin tests to drug                        | 26 (51.0)                   | 10 (28.6)                       | 0.065   |
| Test positivity rate (%)                  | 69.2                        | 60.0                            | 0.110   |
| Patch tests to drug                       | 1 (2.0)                     | 2 (5.7)                         | 0.564   |
| Test positivity rate (%)                  | 0.0                         | 50.0                            | 0.407   |
| Drug safety card issued                   | 46 (90.2)                   | 16 (45.7)                       | 0.001   |

Values are presented as mean ± standard deviation for continuous variables and as number (%) for categorical variables.

NSAIDs, nonsteroidal anti-inflammatory drugs; IgE, immunoglobulin E; Test positivity rate, number of positive results/number of patients tested.

p values indicate comparisons between patients with and without identified culprit drugs.
